# Supplementary material for: Seasonality of cognitive function in the general population: the Rotterdam Study
Source: PubMed Central journal article supplement (PMC8810929; doi:10.1007/s11357-021-00485-0), 2021-11-08
Supplement: 11357_2021_485_MOESM1_ESM.pdf [file 11357_2021_485_MOESM1_ESM.pdf]

# Seasonality of cognitive function in the general population: the Rotterdam Study

## Online Supplemental Material - GeroScience

Sanne S. Mooldijk<sup>1</sup>, Silvan Licher<sup>1</sup>, Meike W. Vernooij<sup>1,2</sup>, M. Kamran Ikram<sup>1,3</sup>, M. Arfan Ikram<sup>1\*</sup>

<sup>1</sup> Department of Epidemiology, Erasmus University Medical Centre, Rotterdam, the Netherlands

<sup>2</sup> Department of Radiology and Nuclear Medicine, Erasmus University Medical Centre, Rotterdam, The Netherlands

<sup>3</sup> Department of Neurology, Erasmus University Medical Centre, Rotterdam, the Netherlands

\*Corresponding author: M. Arfan Ikram, MD, PhD, Department of Epidemiology, Erasmus University Medical Centre, PO Box 2040, 3000 CA, Rotterdam, The Netherlands. E-mail:

[m.a.ikram@erasmusmc.nl](mailto:m.a.ikram@erasmusmc.nl).

## Supplemental Tables

Supplemental Table 1 Characteristics and cognitive test scores of the cognition subset by season

Supplemental Table 2 Characteristics of the brain perfusion subset by season

Supplemental Table 3 Seasonality of cognition adjusted for depressive symptoms

Supplemental Table 4 Seasonality of global cognition in subgroups and after removing individual tests from the calculation of global cognition

Supplemental Table 5 Seasonality pattern of cerebral blood flow and brain perfusion in subgroups

**Supplemental Table 1** Characteristics and cognitive test scores of the cognition subset by season

| <b>Characteristic</b>          | <b>Winter<br/>(N=5187)</b> | <b>Spring<br/>(N=6536)</b> | <b>Summer<br/>(N=3836)</b> | <b>Fall<br/>(N=7371)</b> | <b>P-value</b> |
|--------------------------------|----------------------------|----------------------------|----------------------------|--------------------------|----------------|
| Age, years                     | 68.7 (10.0)                | 67.4 (10.4)                | 68.5 (10.7)                | 68.5 (10.3)              | <.001          |
| Women                          | 2881 (56)                  | 3738 (57)                  | 2211 (58)                  | 4239 (58)                | .111           |
| Caucasian                      | 4910 (96)                  | 6076 (96)                  | 3626 (96)                  | 6963 (96)                | .147           |
| Cohort wave                    |                            |                            |                            |                          | <.001          |
| RS-I                           | 2236 (43)                  | 2613 (40)                  | 1418 (37)                  | 3066 (42)                |                |
| RS-II                          | 1725 (33)                  | 2098 (32)                  | 1277 (33)                  | 2179 (30)                |                |
| RS-III                         | 1226 (24)                  | 1825 (28)                  | 1141 (30)                  | 2126 (29)                |                |
| Education                      |                            |                            |                            |                          | .005           |
| Primary                        | 480 (9)                    | 670 (10)                   | 385 (10)                   | 849 (12)                 |                |
| Lower/intermediate             | 2166 (42)                  | 2687 (41)                  | 1584 (41)                  | 3072 (42)                |                |
| High general                   | 1572 (30)                  | 1982 (30)                  | 1144 (30)                  | 2192 (30)                |                |
| University                     | 969 (19)                   | 1197 (18)                  | 723 (19)                   | 1258 (17)                |                |
| Smoking                        |                            |                            |                            |                          | .005           |
| Never                          | 1948 (38)                  | 2392 (37)                  | 1338 (35)                  | 2785 (38)                |                |
| Former                         | 2442 (47)                  | 3063 (47)                  | 1863 (49)                  | 3330 (46)                |                |
| Current                        | 763 (15)                   | 1073 (16)                  | 601 (16)                   | 1175 (16)                |                |
| Alcohol use                    | 3413 (81)                  | 4465 (81)                  | 2582 (81)                  | 4722 (81)                | .975           |
| BMI, kg/m <sup>2</sup>         | 27.4 (4.2)                 | 27.5 (4.2)                 | 27.3 (4.3)                 | 27.4 (4.3)               | .141           |
| Systolic blood pressure, mmHg  | 145.1 (21.8)               | 142.2 (21.5)               | 141.7 (21.9)               | 143.2 (21.6)             | <.001          |
| CES-D                          | 9 [2-13]                   | 7 [1-13]                   | 7 [1-13]                   | 9 [1-13]                 | <.001          |
| Depressive symptoms            | 629 (12)                   | 783 (12)                   | 437 (12)                   | 956 (13)                 | .075           |
| <b>Cognitive test scores</b>   |                            |                            |                            |                          |                |
| Mini Mental State Examination  | 27.8 (2.0)                 | 27.8 (2.0)                 | 27.8 (2.0)                 | 27.8 (2.0)               | .118           |
| Letter digit substitution test | 28.2 (7.2)                 | 28.6 (7.3)                 | 28.0 (7.3)                 | 28.1 (7.3)               | <.001          |
| Word fluency test              | 21.9 (5.8)                 | 21.8 (5.7)                 | 21.8 (6.0)                 | 21.7 (5.7)               | .571           |
| Stroop, seconds                |                            |                            |                            |                          |                |
| Reading subtask                | 17.8 (3.9)                 | 17.8 (4.2)                 | 17.8 (4.0)                 | 17.9 (4.0)               | .073           |
| Colour naming subtask          | 24.3 (5.4)                 | 24.4 (6.3)                 | 24.6 (6.1)                 | 24.6 (6.1)               | .025           |
| Interference subtask           | 56.3 (26.7)                | 55.4 (25.9)                | 56.9 (29.3)                | 57.2 (28.7)              | .002           |
| Purdue Pegboard test           |                            |                            |                            |                          |                |
| Left hand                      | 12.4 (2.2)                 | 12.6 (2.1)                 | 12.5 (2.1)                 | 12.5 (2.2)               | <.001          |
| Right hand                     | 12.1 (2.1)                 | 12.2 (2.1)                 | 12.2 (2.0)                 | 12.1 (2.1)               | .017           |
| Both hands                     | 9.9 (2.0)                  | 10.0 (2.0)                 | 10.0 (1.9)                 | 10.0 (1.9)               | .001           |
| Word learning test             |                            |                            |                            |                          |                |
| Immediate                      | 14.9 (8.1)                 | 15.3 (8.3)                 | 15.0 (8.0)                 | 14.9 (8.0)               | .042           |
| Delayed                        | 7.1 (3.0)                  | 7.4 (3.0)                  | 7.2 (3.0)                  | 7.2 (2.9)                | .001           |
| Recognition                    | 13.3 (2.1)                 | 13.3 (2.1)                 | 13.3 (2.1)                 | 13.3 (2.1)               | .657           |
| G-factor                       | -0.02 (1.02)               | 0.02 (1.02)                | 0.03 (1.02)                | -0.01 (0.97)             | .120           |

Values are counts (percentages), means (standard deviation) or median [interquartile range]. CES-D, Centre for Epidemiologic Studies Depression scale. Depressive symptoms are classified as a score of 16 or higher.

**Supplemental Table 2** Characteristics and cognitive test scores of the brain perfusion subset by season

| <b>Characteristic</b>             | <b>Winter<br/>(N=2852)</b> | <b>Spring<br/>(N=3052)</b> | <b>Summer<br/>(N=2049)</b> | <b>Fall<br/>(N=3579)</b> | <b>P-value</b> |
|-----------------------------------|----------------------------|----------------------------|----------------------------|--------------------------|----------------|
| Age, years                        | 65.3 (9.6)                 | 65.4 (10.0)                | 65.0 (10.2)                | 65.7 (9.7)               | .059           |
| Women                             | 1512 (53)                  | 1684 (55)                  | 1131 (55)                  | 2001 (56)                | .126           |
| Caucasian                         | 2650 (95)                  | 2823 (94)                  | 1902 (94)                  | 3382 (95)                | .327           |
| Cohort wave                       |                            |                            |                            |                          | <.001          |
| RS-I                              | 327 (12)                   | 442 (14)                   | 298 (15)                   | 529 (15)                 |                |
| RS-II                             | 887 (32)                   | 792 (26)                   | 448 (22)                   | 1002 (28)                |                |
| RS-III                            | 1638 (56)                  | 1818 (60)                  | 1303 (64)                  | 2048 (57)                |                |
| Education                         |                            |                            |                            |                          | .210           |
| Primary                           | 214 (8)                    | 219 (7)                    | 157 (8)                    | 287 (8)                  |                |
| Lower/intermediate                | 1066 (37)                  | 1120 (37)                  | 768 (37)                   | 1368 (38)                |                |
| High general                      | 832 (29)                   | 950 (31)                   | 639 (31)                   | 1104 (31)                |                |
| University                        | 740 (26)                   | 763 (25)                   | 485 (24)                   | 820 (23)                 |                |
| Smoking                           |                            |                            |                            |                          | .003           |
| Never                             | 1097 (39)                  | 1200 (39)                  | 757 (37)                   | 1245 (35)                |                |
| Former                            | 1277 (45)                  | 1328 (44)                  | 959 (47)                   | 1677 (47)                |                |
| Current                           | 470(16)                    | 513 (17)                   | 328 (16)                   | 644 (18)                 |                |
| Alcohol use                       | 1933 (83)                  | 1894 (82)                  | 1334 (85)                  | 2539 (84)                | .285           |
| BMI, kg/m <sup>2</sup>            | 27.3 (4.1)                 | 27.4 (4.0)                 | 27.4 (4.1)                 | 27.3 (4.0)               | .606           |
| Systolic blood pressure, mmHg     | 139.7 (20.3)               | 137.8 (20.4)               | 136.5 (20.1)               | 138.5 (21.1)             | <.001          |
| CES-D                             | 10 [2-13]                  | 10 [3-13]                  | 10 [2-13]                  | 7 [2-12]                 | <.001          |
| Depressive symptoms               | 331 (12)                   | 388 (13)                   | 254 (13)                   | 390 (11)                 | .108           |
| Cerebral blood flow, mL/min       | 525.8 (102.0)              | 522.4 (99.2)               | 523.4 (105.1)              | 518.9 (96.4)             | .047           |
| Brain perfusion, mL/min per 100mL | 56.0 (9.7)                 | 55.8 (9.5)                 | 55.9 (9.8)                 | 55.7 (9.4)               | .648           |

Values are counts (percentages), means (standard deviation) or median [interquartile range]. CES-D, Centre for Epidemiologic Studies Depression scale. Depressive symptoms are classified as a score of 16 or higher.

**Supplemental Table 3** Seasonality of cognition adjusted for depressive symptoms

| Cognitive test                 | Observations <sup>a</sup> | Mean score (SD) | Seasonal variation (95% CI) | Peak                  | P-value |
|--------------------------------|---------------------------|-----------------|-----------------------------|-----------------------|---------|
| G-factor                       | 13,501                    | 0.0 (1.0)       | 0.05 (0.02; 0.08)           | Jun. 19 <sup>th</sup> | .001    |
| Letter digit substitution test | 21,915                    | 28.3 (7.2)      | 0.03 (0.01; 0.05)           | Mar. 20 <sup>st</sup> | .002    |
| Word fluency test              | 21,917                    | 21.8 (5.8)      | 0.01 (-0.02; 0.04)          | Jun. 17 <sup>th</sup> | .385    |
| Stroop                         |                           |                 |                             |                       |         |
| Reading subtask                | 21,240                    | 17.8 (4.0)      | 0.03 (0.00; 0.06)           | Jun. 24 <sup>th</sup> | .053    |
| Colour naming subtask          | 21,307                    | 24.4 (5.7)      | 0.00 (-0.02; 0.03)          | Mar. 24 <sup>th</sup> | .799    |
| Interference subtask           | 21,240                    | 56.2 (27.5)     | 0.02 (0.00; 0.05)           | Mar. 4 <sup>th</sup>  | .059    |
| Purdue Pegboard test           |                           |                 |                             |                       |         |
| Left hand                      | 17,704                    | 12.2 (2.1)      | 0.07 (0.04; 0.11)           | Jul. 10 <sup>th</sup> | <.001   |
| Right hand                     | 17,568                    | 12.5 (2.1)      | 0.08 (0.05; 0.12)           | Jul. 6 <sup>th</sup>  | <.001   |
| Both hands                     | 17,443                    | 10.0 (1.9)      | 0.09 (0.06; 0.13)           | Jul. 15 <sup>th</sup> | <.001   |
| Word learning test             |                           |                 |                             |                       |         |
| Immediate                      | 14,989                    | 15.0 (8.1)      | 0.04 (0.00; 0.08)           | Jun. 4 <sup>th</sup>  | .075    |
| Delayed                        | 14,976                    | 7.2 (3.0)       | 0.04 (0.00; 0.08)           | Jun. 22 <sup>nd</sup> | .030    |
| Recognition                    | 15,077                    | 13.3 (2.1)      | 0.03 (-0.01; 0.07)          | Aug. 28 <sup>th</sup> | .161    |

Results from linear mixed model with cosinor terms, adjusted for age at examination, sex, cohort wave, education and Centre for Epidemiology Studies Depression (CES-D) score (model 2). All cognitive test scores are standardized. Seasonal variation indicates the difference in standard deviation between the estimated lowest and highest scores throughout the year. The peak indicates the date at which the performance for the specific test is expected to be the highest.

The CES-D is reflective of depressive symptoms and higher scores indicate more complaints. CES-D scores peaked in January and had a seasonal variation of 0.56 points (95% confidence interval 0.28-0.84, adjusted using model 1).

<sup>a</sup>Number of cognitive tests for which complete data on covariates in model 1 were available.

SD, standard deviation; CI, confidence interval.

**Supplemental Table 4** Seasonality of global cognition in subgroups and after removing individual tests from the calculation of global cognition

| Global cognition              | Observations <sup>a</sup> | Mean score (SD) | Seasonal variation (95% CI) | Peak                  | P-value |
|-------------------------------|---------------------------|-----------------|-----------------------------|-----------------------|---------|
| Total group                   | 13,654                    | 0.00 (1.00)     | 0.05 (0.02; 0.08)           | Jun. 19 <sup>th</sup> | .001    |
| <b>Sex</b>                    |                           |                 |                             |                       |         |
| Men                           | 5830                      | -0.10 (0.95)    | 0.04 (0.00; 0.09)           | Jun. 25 <sup>th</sup> | .049    |
| Women                         | 7824                      | 0.08 (1.03)     | 0.05 (0.02; 0.10)           | Jun. 23 <sup>rd</sup> | .005    |
| <b>Age groups</b>             |                           |                 |                             |                       |         |
| <70 years                     | 7572                      | 0.45 (0.80)     | 0.04 (-0.01; 0.09)          | Jun. 20 <sup>th</sup> | .100    |
| ≥70 years                     | 6082                      | -0.56 (0.94)    | 0.02 (-0.02; 0.06)          | Jul. 3 <sup>rd</sup>  | .371    |
| <b>MMSE</b>                   |                           |                 |                             |                       |         |
| <28                           | 4285                      | -0.54 (1.05)    | 0.05 (-0.01; 0.12)          | Aug. 8 <sup>th</sup>  | .102    |
| ≥28                           | 9320                      | 0.25 (0.87)     | 0.05 (0.02; 0.08)           | Jun. 24 <sup>th</sup> | .004    |
| Dementia <5 years excluded    | 13,299                    | 0.05 (0.96)     | 0.05 (0.02; 0.08)           | Jun. 21 <sup>st</sup> | .001    |
| CES-D ≥16 excluded            | 11,707                    | 0.03 (0.99)     | 0.06 (0.03; 0.09)           | Jun. 30 <sup>th</sup> | <.001   |
| Excluding LDST                | 13,748                    | 0.00 (1.00)     | 0.06 (0.02; 0.09)           | Jul. 10 <sup>th</sup> | .089    |
| Excluding WFT                 | 13,680                    | 0.00 (1.00)     | 0.05 (0.02; 0.08)           | Jun. 17 <sup>th</sup> | .083    |
| Excluding Stroop interference | 10,860                    | 0.00 (1.00)     | 0.06 (0.02; 0.09)           | Jun. 21 <sup>st</sup> | .088    |
| Excluding WLT delayed         | 16,463                    | 0.00 (1.00)     | 0.04 (0.01; 0.07)           | Jun. 24 <sup>th</sup> | .068    |
| Excluding PPB both hands      | 14,437                    | 0.00 (1.00)     | 0.04 (0.01; 0.06)           | May 2 <sup>nd</sup>   | .063    |

Results from linear mixed model with cosinor terms, adjusted for age at examination, sex, cohort wave and education (model 1). Seasonal variation indicates the difference in standard deviation between the estimated lowest and highest scores throughout the year. The peak indicates the date at which the performance for the specific test is expected to be the highest.

A score of 16 or higher on the Centre for Epidemiology Studies Depression (CES-D) is indicative of depressive symptoms.

<sup>a</sup>Number of cognitive tests for which complete data on covariates in model 1 were available.

SD, standard deviation; CI, confidence interval; LDST, letter digit substitution test; WFT, word fluency test; WLT, word learning test; PPB, Purdue Pegboard test.

**Supplemental Table 5** Seasonality pattern of cerebral blood flow and brain perfusion in subgroups

| Subgroup                                     | Observations <sup>a</sup> | Mean score<br>(SD) | Seasonal<br>variation (95% CI) | Peak                  | P-value |
|----------------------------------------------|---------------------------|--------------------|--------------------------------|-----------------------|---------|
| <b>Cerebral blood flow,<br/>mL/min</b>       |                           |                    |                                |                       |         |
| Total group                                  | 11,878                    | 522.3 (100.1)      | 1.7 (-2.05; 5.9)               | Mar. 9 <sup>th</sup>  | .427    |
| Sex                                          |                           |                    |                                |                       |         |
| Men                                          | 5204                      | 530.1 (101.5)      | 1.8 (-4.3; 7.8)                | Mar. 13 <sup>th</sup> | .567    |
| Women                                        | 6328                      | 516.0 (98.6)       | 3.4 (-1.9; 8.7)                | Feb. 12 <sup>th</sup> | .205    |
| Age groups                                   |                           |                    |                                |                       |         |
| <70 years                                    | 7955                      | 543.9 (98.1)       | 5.7 (0.3; 11.2)                | Mar. 26 <sup>th</sup> | .040    |
| ≥70 years                                    | 3577                      | 476.7 (89.0)       | 2.0 (-5.4; 9.4)                | Jun. 15 <sup>th</sup> | .600    |
| MMSE                                         |                           |                    |                                |                       |         |
| <28                                          | 3394                      | 505.5 (99.9)       | 7.2 (-0.8; 15.2)               | Feb. 24 <sup>th</sup> | .078    |
| ≥28                                          | 8088                      | 529.5 (99.5)       | 1.2 (-3.8; 6.2)                | May 27 <sup>th</sup>  | .645    |
| Dementia <5 years excluded                   | 11,341                    | 523.6 (99.8)       | 1.0 (-3.1; 5.2)                | Mar. 4 <sup>th</sup>  | .623    |
| <b>Brain perfusion, mL/min<br/>per 100mL</b> |                           |                    |                                |                       |         |
| Total group                                  | 11,878                    | 55.9 (9.6)         | 0.3 (-0.2; 0.7)                | Mar. 18 <sup>th</sup> | .271    |
| Sex                                          |                           |                    |                                |                       |         |
| Men                                          | 5204                      | 53.6 (8.9)         | 0.4 (-0.2; 1.0)                | Feb. 17 <sup>th</sup> | .249    |
| Women                                        | 6328                      | 57.7 (9.7)         | 0.4 (-0.2; 1.0)                | Feb. 4 <sup>th</sup>  | .168    |
| Age groups                                   |                           |                    |                                |                       |         |
| <70 years                                    | 7955                      | 56.9 (9.5)         | 0.6 (0.1; 1.2)                 | Mar. 27 <sup>th</sup> | .026    |
| ≥70 years                                    | 3577                      | 53.6 (9.4)         | 0.1 (-0.8; 0.9)                | Jul. 9 <sup>th</sup>  | .871    |
| MMSE                                         |                           |                    |                                |                       |         |
| <28                                          | 3394                      | 55.2 (9.7)         | 0.9 (0.1; 1.8)                 | Mar. 8 <sup>th</sup>  | .034    |
| ≥28                                          | 8088                      | 56.1 (9.5)         | 0.1 (-0.4; 0.6)                | Apr. 12 <sup>th</sup> | .770    |
| Dementia <5 years excluded                   | 11,341                    | 55.9 (9.6)         | 0.2 (-0.2; 0.7)                | Mar. 25 <sup>th</sup> | .354    |

Results from linear mixed model with cosinor terms, adjusted for age at examination, sex, cohort wave and education (model 1). Seasonal variation indicates the difference in cerebral blood flow or in brain perfusion between the estimated lowest and highest values throughout the year. The peak indicates the date at which the flow or perfusion is expected to be the highest.

<sup>a</sup>Number of scans for which complete data on covariates in model 1 were available.

SD, standard deviation; CI, confidence interval.
